# Supplementary material
Source: MDPI journal article supplement (https://www.mdpi.com/2227-7390/9/17/2024)
Supplement: s1 [file s1]

**Table S1.** Partial and overall ranks of all estimation methods for various combinations of  $\theta$ .

| $\theta^T$                                    | $n$ | <i>WLSE</i> | <i>OLSE</i> | <i>MLE</i> | <i>MPSE</i> | <i>CVME</i> | <i>ADE</i> | <i>RADE</i> | <i>PCE</i> |
|-----------------------------------------------|-----|-------------|-------------|------------|-------------|-------------|------------|-------------|------------|
| $(\eta = -0.50, \zeta = 0.50, \theta = 0.40)$ | 50  | 3           | 4           | 7          | 6           | 8           | 1          | 2           | 5          |
|                                               | 80  | 3           | 4           | 7          | 6           | 8           | 2          | 1           | 5          |
|                                               | 120 | 3           | 4           | 7          | 6           | 8           | 1          | 2           | 5          |
|                                               | 200 | 3           | 4           | 7          | 5           | 8           | 1          | 2           | 6          |
|                                               | 300 | 2           | 4           | 7          | 5.5         | 8           | 1          | 3           | 5.5        |
| $(\eta = -0.50, \zeta = 0.50, \theta = 1.60)$ | 50  | 2           | 5           | 3.5        | 7           | 8           | 1          | 3.5         | 6          |
|                                               | 80  | 2           | 5           | 3          | 7           | 8           | 1          | 4           | 6          |
|                                               | 120 | 2           | 4           | 3          | 7           | 8           | 1          | 5           | 6          |
|                                               | 200 | 2           | 4.5         | 3          | 6.5         | 8           | 1          | 6.5         | 4.5        |
|                                               | 300 | 2           | 4           | 3          | 7           | 8           | 1          | 6           | 5          |
| $(\eta = -0.50, \zeta = 0.50, \theta = 2.75)$ | 50  | 4           | 5           | 2          | 3           | 8           | 1          | 6           | 7          |
|                                               | 80  | 2           | 6.5         | 3          | 4           | 8           | 1          | 5           | 6.5        |
|                                               | 120 | 2           | 7           | 3          | 4           | 8           | 1          | 5.5         | 5.5        |
|                                               | 200 | 2           | 6           | 3.5        | 3.5         | 8           | 1          | 7           | 5          |
|                                               | 300 | 2           | 7           | 3.5        | 3.5         | 8           | 1          | 6           | 5          |
| $(\eta = -0.50, \zeta = 1.75, \theta = 0.40)$ | 50  | 3           | 4.5         | 7          | 6           | 8           | 2          | 1           | 4.5        |
|                                               | 80  | 3           | 4.5         | 7          | 6           | 8           | 1          | 2           | 4.5        |
|                                               | 120 | 3           | 5           | 7          | 6           | 8           | 2          | 1           | 4          |
|                                               | 200 | 3           | 5           | 7          | 6           | 8           | 1          | 2           | 4          |
|                                               | 300 | 3           | 5           | 7          | 6           | 8           | 1          | 2           | 4          |
| $(\eta = -0.50, \zeta = 1.75, \theta = 1.60)$ | 50  | 3           | 4           | 6.5        | 6.5         | 8           | 1          | 2           | 5          |
|                                               | 80  | 2.5         | 5           | 6.5        | 6.5         | 8           | 1          | 2.5         | 4          |
|                                               | 120 | 1           | 5           | 7          | 6           | 8           | 2          | 3           | 4          |
|                                               | 200 | 2           | 5           | 7          | 6           | 8           | 1          | 3           | 4          |
|                                               | 300 | 1.5         | 5           | 6          | 7           | 8           | 1.5        | 3           | 4          |
| $(\eta = -0.50, \zeta = 1.75, \theta = 2.75)$ | 50  | 3           | 5           | 6          | 7           | 8           | 1          | 2           | 4          |
|                                               | 80  | 2.5         | 5           | 6          | 7           | 8           | 1          | 2.5         | 4          |
|                                               | 120 | 2           | 5.5         | 5.5        | 7           | 8           | 1          | 3           | 4          |
|                                               | 200 | 2           | 5.5         | 5.5        | 7           | 8           | 1          | 3           | 4          |
|                                               | 300 | 2           | 5.5         | 5.5        | 7           | 8           | 1          | 3           | 4          |

|                                               |     |     |     |     |     |   |     |     |     |
|-----------------------------------------------|-----|-----|-----|-----|-----|---|-----|-----|-----|
| $(\eta = -0.50, \zeta = 3.00, \theta = 0.40)$ | 50  | 3   | 4   | 7   | 6   | 8 | 2   | 1   | 5   |
|                                               | 80  | 3   | 5   | 7   | 6   | 8 | 2   | 1   | 4   |
|                                               | 120 | 3   | 4   | 7   | 6   | 8 | 2   | 1   | 5   |
|                                               | 200 | 3   | 5   | 7   | 6   | 8 | 1.5 | 1.5 | 4   |
|                                               | 300 | 2   | 6   | 7   | 5   | 8 | 3   | 1   | 4   |
| $(\eta = -0.50, \zeta = 3.00, \theta = 1.60)$ | 50  | 3   | 4.5 | 7   | 6   | 8 | 1   | 2   | 4.5 |
|                                               | 80  | 2   | 4   | 7   | 6   | 8 | 1   | 3   | 5   |
|                                               | 120 | 3   | 5   | 7   | 6   | 8 | 1   | 2   | 4   |
|                                               | 200 | 2   | 5   | 7   | 6   | 8 | 1   | 3   | 4   |
|                                               | 300 | 1   | 5   | 7   | 6   | 8 | 2   | 3   | 4   |
| $(\eta = -0.50, \zeta = 3.00, \theta = 2.75)$ | 50  | 3   | 4   | 6   | 7   | 8 | 1   | 2   | 5   |
|                                               | 80  | 3   | 5   | 6.5 | 6.5 | 8 | 1   | 2   | 4   |
|                                               | 120 | 3   | 5   | 7   | 6   | 8 | 1   | 2   | 4   |
|                                               | 200 | 1   | 5   | 7   | 6   | 8 | 2   | 3   | 4   |
|                                               | 300 | 2   | 5   | 7   | 6   | 8 | 1   | 3   | 4   |
| $(\eta = 0.75, \zeta = 0.50, \theta = 0.40)$  | 50  | 3   | 4   | 5   | 6.5 | 8 | 1   | 2   | 6.5 |
|                                               | 80  | 2   | 4   | 5   | 6.5 | 8 | 1   | 3   | 6.5 |
|                                               | 120 | 3   | 4   | 5   | 6   | 8 | 1   | 2   | 7   |
|                                               | 200 | 2   | 4   | 5   | 6   | 8 | 1   | 3   | 7   |
|                                               | 300 | 1.5 | 5   | 6   | 4   | 8 | 1.5 | 3   | 7   |
| $(\eta = 0.75, \zeta = 0.50, \theta = 1.60)$  | 50  | 3   | 6.5 | 2   | 6.5 | 8 | 1   | 4   | 5   |
|                                               | 80  | 3   | 4.5 | 2   | 6   | 8 | 1   | 4.5 | 7   |
|                                               | 120 | 2   | 6   | 3   | 5   | 8 | 1   | 7   | 4   |
|                                               | 200 | 3   | 6   | 2   | 5   | 8 | 1   | 7   | 4   |
|                                               | 300 | 2.5 | 6   | 2.5 | 4.5 | 8 | 1   | 7   | 4.5 |

**Table S1.** Partial and overall ranks of all estimation methods for various combinations of  $\theta$  (continued).

| $\theta^T$                                   | $n$ | WLSE | OLSE | MLE | MPSE | CVME | ADE | RADE | PCE |
|----------------------------------------------|-----|------|------|-----|------|------|-----|------|-----|
| $(\eta = 0.75, \zeta = 0.50, \theta = 2.75)$ | 50  | 4    | 7    | 2   | 3    | 8    | 1   | 5    | 6   |
|                                              | 80  | 4    | 6    | 2   | 3    | 8    | 1   | 7    | 5   |
|                                              | 120 | 4    | 6    | 2   | 3    | 8    | 1   | 7    | 5   |
|                                              | 200 | 4    | 6    | 2   | 3    | 8    | 1   | 7    | 5   |

|                                              |     |     |     |     |     |   |     |     |     |
|----------------------------------------------|-----|-----|-----|-----|-----|---|-----|-----|-----|
|                                              | 300 | 4.5 | 6   | 1   | 2.5 | 8 | 2.5 | 7   | 4.5 |
|                                              | 50  | 3   | 4   | 5   | 6   | 8 | 2   | 1   | 7   |
|                                              | 80  | 3   | 4   | 7   | 5   | 8 | 2   | 1   | 6   |
| $(\eta = 0.75, \zeta = 1.75, \theta = 0.40)$ | 120 | 3   | 4   | 7   | 5   | 8 | 2   | 1   | 6   |
|                                              | 200 | 3   | 4   | 7   | 5   | 8 | 2   | 1   | 6   |
|                                              | 300 | 3   | 4   | 7   | 5   | 8 | 2   | 1   | 6   |
|                                              | 50  | 3   | 4   | 6   | 7   | 8 | 1   | 2   | 5   |
|                                              | 80  | 3   | 4   | 7   | 6   | 8 | 1   | 2   | 5   |
| $(\eta = 0.75, \zeta = 1.75, \theta = 1.60)$ | 120 | 3   | 4.5 | 7   | 6   | 8 | 1   | 2   | 4.5 |
|                                              | 200 | 2   | 4   | 7   | 6   | 8 | 1   | 3   | 5   |
|                                              | 300 | 2   | 4   | 7   | 5.5 | 8 | 1   | 3   | 5.5 |
|                                              | 50  | 3   | 4   | 6   | 7   | 8 | 1   | 2   | 5   |
|                                              | 80  | 2   | 4   | 5.5 | 7   | 8 | 1   | 3   | 5.5 |
| $(\eta = 0.75, \zeta = 1.75, \theta = 2.75)$ | 120 | 2   | 5   | 6   | 7   | 8 | 1   | 3   | 4   |
|                                              | 200 | 2   | 5.5 | 7   | 5.5 | 8 | 1   | 3   | 4   |
|                                              | 300 | 1   | 5   | 7   | 6   | 8 | 2   | 3   | 4   |
|                                              | 50  | 3   | 4   | 5   | 6   | 8 | 2   | 1   | 7   |
|                                              | 80  | 3   | 4   | 6   | 5   | 8 | 2   | 1   | 7   |
| $(\eta = 0.75, \zeta = 3.00, \theta = 0.40)$ | 120 | 3   | 4   | 6   | 5   | 8 | 2   | 1   | 7   |
|                                              | 200 | 3   | 4   | 7   | 5   | 8 | 2   | 1   | 6   |
|                                              | 300 | 3   | 5   | 7   | 4   | 8 | 2   | 1   | 6   |
|                                              | 50  | 3   | 4   | 7   | 5   | 8 | 1   | 2   | 6   |
|                                              | 80  | 2.5 | 4   | 7   | 5.5 | 8 | 1   | 2.5 | 5.5 |
| $(\eta = 0.75, \zeta = 3.00, \theta = 1.60)$ | 120 | 2.5 | 4   | 7   | 5.5 | 8 | 1   | 2.5 | 5.5 |
|                                              | 200 | 1   | 5   | 7   | 6   | 8 | 2   | 3   | 4   |
|                                              | 300 | 2   | 5   | 7   | 5   | 8 | 1   | 3   | 5   |
|                                              | 50  | 3   | 4   | 7   | 6   | 8 | 1   | 2   | 5   |
|                                              | 80  | 2.5 | 4   | 7   | 6   | 8 | 1   | 2.5 | 5   |
| $(\eta = 0.75, \zeta = 3.00, \theta = 2.75)$ | 120 | 1   | 5   | 7   | 6   | 8 | 3   | 2   | 4   |
|                                              | 200 | 1   | 6   | 7   | 5   | 8 | 2   | 3   | 4   |
|                                              | 300 | 2   | 6   | 7   | 4   | 8 | 1   | 3   | 5   |
|                                              | 50  | 3   | 4   | 5   | 6   | 8 | 1   | 2   | 7   |
|                                              | 80  | 3   | 4   | 5   | 6   | 8 | 1   | 2   | 7   |

|                                              |     |   |   |     |     |   |     |   |     |
|----------------------------------------------|-----|---|---|-----|-----|---|-----|---|-----|
| $(\eta = 1.50, \zeta = 0.50, \theta = 0.40)$ | 120 | 2 | 4 | 5.5 | 5.5 | 8 | 1   | 3 | 7   |
|                                              | 200 | 2 | 4 | 6   | 5   | 8 | 1   | 3 | 7   |
|                                              | 300 | 1 | 5 | 6   | 4   | 8 | 2   | 3 | 7   |
| $(\eta = 1.50, \zeta = 0.50, \theta = 1.60)$ | 50  | 3 | 7 | 2   | 6   | 8 | 1   | 4 | 5   |
|                                              | 80  | 3 | 5 | 2   | 4   | 8 | 1   | 7 | 6   |
|                                              | 120 | 3 | 6 | 2   | 4.5 | 8 | 1   | 7 | 4.5 |
| $(\eta = 1.50, \zeta = 0.50, \theta = 2.75)$ | 200 | 3 | 6 | 2   | 5   | 8 | 1   | 7 | 4   |
|                                              | 300 | 2 | 6 | 3   | 4   | 8 | 1   | 7 | 5   |
|                                              | 50  | 5 | 6 | 2   | 3   | 8 | 1   | 7 | 4   |
| $(\eta = 1.50, \zeta = 1.75, \theta = 0.40)$ | 80  | 4 | 6 | 2   | 3   | 8 | 1   | 7 | 5   |
|                                              | 120 | 4 | 6 | 2   | 3   | 8 | 1   | 7 | 5   |
|                                              | 200 | 5 | 6 | 3   | 1.5 | 8 | 1.5 | 7 | 4   |
| $(\eta = 1.50, \zeta = 1.75, \theta = 1.60)$ | 300 | 5 | 6 | 3   | 1   | 8 | 2   | 7 | 4   |
|                                              | 50  | 3 | 4 | 5   | 6   | 8 | 2   | 1 | 7   |
|                                              | 80  | 3 | 4 | 6   | 5   | 8 | 2   | 1 | 7   |
| $(\eta = 1.50, \zeta = 1.75, \theta = 2.75)$ | 120 | 3 | 4 | 7   | 5   | 8 | 2   | 1 | 6   |
|                                              | 200 | 3 | 4 | 7   | 5   | 8 | 2   | 1 | 6   |
|                                              | 300 | 3 | 5 | 7   | 4   | 8 | 2   | 1 | 6   |

**Table S1.** Partial and overall ranks of all estimation methods for various combinations of  $\theta$  (continued).

| $\theta^T$                                   | $n$ | $WLSE$ | $OLSE$ | $MLE$ | $MPSE$ | $CVME$ | $ADE$ | $RADE$ | $PCE$ |
|----------------------------------------------|-----|--------|--------|-------|--------|--------|-------|--------|-------|
| $(\eta = 1.50, \zeta = 1.75, \theta = 1.60)$ | 50  | 3      | 4      | 7     | 6      | 8      | 1     | 2      | 5     |
|                                              | 80  | 3      | 4      | 7     | 6      | 8      | 1     | 2      | 5     |
|                                              | 120 | 1      | 4      | 7     | 5      | 8      | 2     | 3      | 6     |
|                                              | 200 | 2      | 5      | 7     | 4      | 8      | 1     | 3      | 6     |
|                                              | 300 | 2      | 5      | 7     | 4      | 8      | 1     | 3      | 6     |
| $(\eta = 1.50, \zeta = 1.75, \theta = 2.75)$ | 50  | 3      | 4      | 6     | 7      | 8      | 1     | 2      | 5     |
|                                              | 80  | 3      | 4      | 6     | 7      | 8      | 1     | 2      | 5     |
|                                              | 120 | 2      | 4      | 6     | 6      | 8      | 1     | 3      | 6     |
|                                              | 200 | 2      | 5      | 7     | 4      | 8      | 1     | 3      | 6     |
|                                              | 300 | 1      | 4.5    | 7     | 4.5    | 8      | 2     | 3      | 6     |
|                                              | 50  | 3      | 4      | 5     | 6      | 8      | 1     | 2      | 7     |

|                                              |     |     |     |     |     |   |     |     |     |
|----------------------------------------------|-----|-----|-----|-----|-----|---|-----|-----|-----|
| $(\eta = 1.50, \zeta = 3.00, \theta = 0.40)$ | 80  | 3   | 4   | 6   | 5   | 8 | 2   | 1   | 7   |
|                                              | 120 | 3   | 4.5 | 6   | 4.5 | 8 | 2   | 1   | 7   |
|                                              | 200 | 3   | 4   | 6.5 | 5   | 8 | 2   | 1   | 6.5 |
|                                              | 300 | 3   | 5   | 7   | 4   | 8 | 1   | 2   | 6   |
| $(\eta = 1.50, \zeta = 3.00, \theta = 1.60)$ | 50  | 3   | 4   | 7   | 5.5 | 8 | 1   | 2   | 5.5 |
|                                              | 80  | 3   | 4   | 7   | 6   | 8 | 1   | 2   | 5   |
|                                              | 120 | 3   | 4   | 7   | 5.5 | 8 | 1   | 2   | 5.5 |
|                                              | 200 | 1   | 4   | 7   | 5   | 8 | 2   | 3   | 6   |
|                                              | 300 | 3   | 5.5 | 7   | 4   | 8 | 1   | 2   | 5.5 |
| $(\eta = 1.50, \zeta = 3.00, \theta = 2.75)$ | 50  | 3   | 4   | 7   | 6   | 8 | 1   | 2   | 5   |
|                                              | 80  | 3   | 4   | 7   | 6   | 8 | 1   | 2   | 5   |
|                                              | 120 | 2   | 4.5 | 7   | 6   | 8 | 1   | 3   | 4.5 |
|                                              | 200 | 2   | 6   | 7   | 4   | 8 | 1   | 3   | 5   |
|                                              | 300 | 1.5 | 6   | 7   | 4   | 8 | 1.5 | 3   | 5   |
| $(\eta = 4.00, \zeta = 0.50, \theta = 0.40)$ | 50  | 3   | 4.5 | 6   | 4.5 | 8 | 1   | 2   | 7   |
|                                              | 80  | 2.5 | 5   | 6   | 4   | 8 | 1   | 2.5 | 7   |
|                                              | 120 | 3   | 5   | 6   | 4   | 8 | 1   | 2   | 7   |
|                                              | 200 | 2   | 5   | 6   | 4   | 8 | 1   | 3   | 7   |
|                                              | 300 | 1   | 5   | 6   | 4   | 8 | 2   | 3   | 7   |
| $(\eta = 4.00, \zeta = 0.50, \theta = 1.60)$ | 50  | 3   | 7   | 2   | 5.5 | 8 | 1   | 4   | 5.5 |
|                                              | 80  | 2   | 5   | 3   | 4   | 8 | 1   | 6   | 7   |
|                                              | 120 | 3   | 5   | 2   | 4   | 8 | 1   | 7   | 6   |
|                                              | 200 | 4   | 5   | 2   | 3   | 8 | 1   | 7   | 6   |
|                                              | 300 | 1   | 5   | 4   | 2   | 8 | 3   | 7   | 6   |
| $(\eta = 4.00, \zeta = 0.50, \theta = 2.75)$ | 50  | 5   | 4   | 2   | 3   | 8 | 1   | 7   | 6   |
|                                              | 80  | 4   | 6   | 3   | 2   | 8 | 1   | 7   | 5   |
|                                              | 120 | 4.5 | 6   | 3   | 2   | 8 | 1   | 7   | 4.5 |
|                                              | 200 | 5   | 6   | 3   | 1.5 | 8 | 1.5 | 7   | 4   |
|                                              | 300 | 5   | 6   | 3   | 1   | 8 | 2   | 7   | 4   |
| $(\eta = 4.00, \zeta = 1.75, \theta = 0.40)$ | 50  | 3   | 5   | 6   | 4   | 8 | 2   | 1   | 7   |
|                                              | 80  | 3   | 5   | 6   | 4   | 8 | 2   | 1   | 7   |
|                                              | 120 | 3   | 5   | 6   | 4   | 8 | 2   | 1   | 7   |
|                                              | 200 | 3   | 5   | 6   | 4   | 8 | 2   | 1   | 7   |

|                                              |     |     |     |   |   |   |   |     |     |
|----------------------------------------------|-----|-----|-----|---|---|---|---|-----|-----|
|                                              | 300 | 3   | 5   | 7 | 4 | 8 | 2 | 1   | 6   |
|                                              | 50  | 3   | 4   | 5 | 6 | 8 | 1 | 2   | 7   |
|                                              | 80  | 3   | 4   | 7 | 5 | 8 | 1 | 2   | 6   |
| $(\eta = 4.00, \zeta = 1.75, \theta = 1.60)$ | 120 | 2   | 5   | 7 | 4 | 8 | 1 | 3   | 6   |
|                                              | 200 | 2   | 5   | 7 | 4 | 8 | 1 | 3   | 6   |
|                                              | 300 | 3   | 5   | 7 | 4 | 8 | 1 | 2   | 6   |
|                                              | 50  | 3   | 5   | 6 | 4 | 8 | 1 | 2   | 7   |
|                                              | 80  | 2.5 | 6   | 5 | 4 | 8 | 1 | 2.5 | 7   |
| $(\eta = 4.00, \zeta = 1.75, \theta = 2.75)$ | 120 | 2   | 5   | 7 | 4 | 8 | 1 | 3   | 6   |
|                                              | 200 | 2   | 5.5 | 7 | 4 | 8 | 1 | 3   | 5.5 |
|                                              | 300 | 2   | 5.5 | 7 | 4 | 8 | 1 | 3   | 5.5 |

**Table S1.** Partial and overall ranks of all estimation methods for various combinations of  $\theta$  (continued).

| $\theta^T$                                   | $n$ | WLSE | OLSE  | MLE  | MPSE  | CVME | ADE   | RADE  | PCE |
|----------------------------------------------|-----|------|-------|------|-------|------|-------|-------|-----|
|                                              | 50  | 3    | 6     | 5    | 4     | 7    | 2     | 1     | 8   |
|                                              | 80  | 3    | 5     | 6    | 4     | 8    | 2     | 1     | 7   |
| $(\eta = 4.00, \zeta = 3.00, \theta = 0.40)$ | 120 | 3    | 5     | 6    | 4     | 8    | 1     | 2     | 7   |
|                                              | 200 | 2    | 5     | 6    | 4     | 8    | 3     | 1     | 7   |
|                                              | 300 | 3    | 5     | 6    | 2     | 8    | 4     | 1     | 7   |
|                                              | 50  | 3    | 4     | 6    | 5     | 8    | 1     | 2     | 7   |
|                                              | 80  | 3    | 5     | 7    | 4     | 8    | 1     | 2     | 6   |
| $(\eta = 4.00, \zeta = 3.00, \theta = 1.60)$ | 120 | 3    | 5     | 7    | 4     | 8    | 1     | 2     | 6   |
|                                              | 200 | 2    | 5     | 7    | 4     | 8    | 1     | 3     | 6   |
|                                              | 300 | 2    | 6     | 7    | 3     | 8    | 1     | 4     | 5   |
|                                              | 50  | 2.5  | 4.5   | 6.5  | 4.5   | 8    | 1     | 2.5   | 6.5 |
|                                              | 80  | 3    | 5     | 7    | 4     | 8    | 1     | 2     | 6   |
| $(\eta = 4.00, \zeta = 3.00, \theta = 2.75)$ | 120 | 2    | 5.5   | 7    | 4     | 8    | 1     | 3     | 5.5 |
|                                              | 200 | 1    | 6     | 7    | 4     | 8    | 2     | 3     | 5   |
|                                              | 300 | 2    | 6     | 7    | 4     | 8    | 1     | 3     | 5   |
| $\sum Ranks$                                 |     | 478  | 878.5 | 1012 | 893.5 | 1439 | 240.5 | 550.5 | 988 |
| <i>Overall Rank</i>                          |     | 2    | 4     | 7    | 5     | 8    | 1     | 3     | 6   |
